# Supplementary material for: A simple low-temperature growth of ZnO nanowhiskers directly from aqueous solution containing Zn(OH)42? ions
Source: Royal Society of Chemistry journal article supplement (doi:10.1039/b409425e), 2004-01-01
Supplement: b409425e.pdf [file b409425e.pdf]

## Supplementary Information

[1]

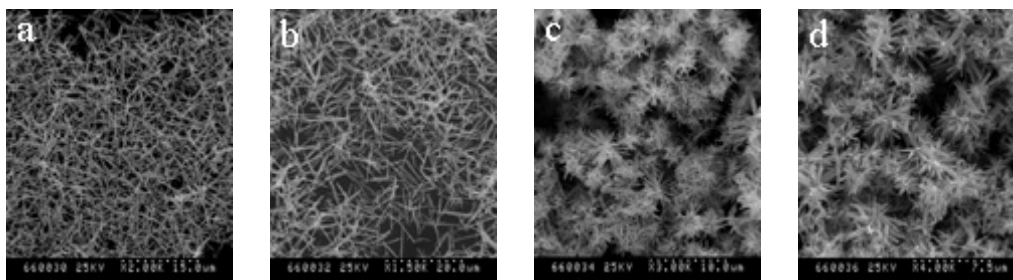

SEM images of ZnO crystals obtained under the condition described in the submitted copy with different molar ratios of Zn<sup>2+</sup>/OH<sup>-</sup> (a)1:6; (b)1:7; (c)1:8; (d)1:9

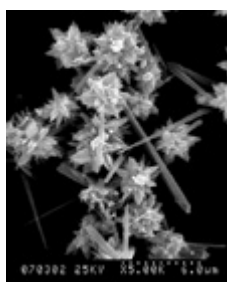

SEM image of ZnO crystals obtained with the molar ratio of Zn<sup>2+</sup>/OH<sup>-</sup>=1:7, excluding the procedure of nucleation at room temperature.

[2]

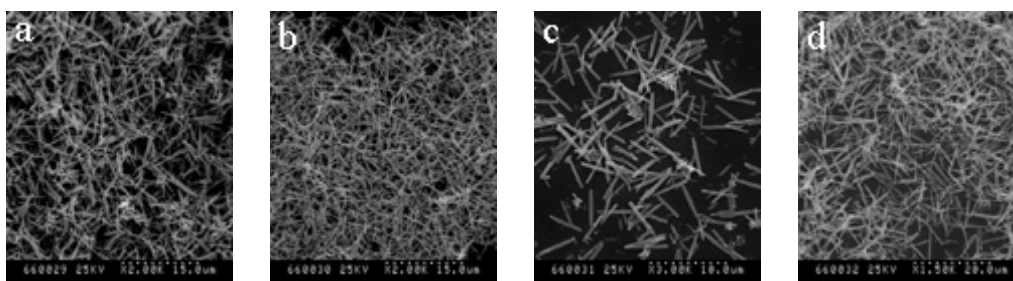

SEM images of ZnO crystals obtained in the absence of SDS (a) molar ratio of Zn<sup>2+</sup>/OH<sup>-</sup>=1:6; (c) molar ratio of Zn<sup>2+</sup>/OH<sup>-</sup>=1:7 and in the presence of SDS (b) molar ratio of Zn<sup>2+</sup>/OH<sup>-</sup>=1:6; (d) molar ratio of Zn<sup>2+</sup>/OH<sup>-</sup>=1:7
